# Supplementary material
Source: PubMed Central journal article supplement (PMC3753872)
Supplement: MCB.00343-13_zmb999100119so1.pdf [file MCB.00343-13_zmb999100119so1.pdf]

**Supplemental Material**

**MicroRNA-329 suppresses angiogenesis by targeting CD146**

**Ping Wang<sup>1,2</sup>, Yongting Luo<sup>1</sup>, Hongxia Duan<sup>1,2</sup>, Shu Xing<sup>1,2</sup>, Jianlin Zhang<sup>1,2</sup>, Di Lu<sup>1</sup>,  
Jing Feng<sup>1</sup>, Dongling Yang<sup>1</sup>, Lina Song<sup>1</sup>, Xiyun Yan<sup>1,\*</sup>**

<sup>1</sup> Key Laboratory of Protein and Peptide Pharmaceutical, CAS-University of Tokyo Joint  
Laboratory of Structural Virology and Immunology, Institute of Biophysics, Chinese  
Academy of Sciences, 15 Datun Road, Beijing 100101, China

<sup>2</sup> University of Chinese Academy of Sciences, 19A Yuquan Road, Beijing 100049,  
China

**\*Corresponding author:**

Xiyun Yan

Institute of Biophysics, Chinese Academy of Sciences, 15 Datun Road, Beijing 100101,  
China

E-mail: [yanxy@ibp.ac.cn](mailto:yanxy@ibp.ac.cn)

Tel: +86 10 64888583

Fax: +86 10 64888584

18 **Table S1** Primer sequences.

**Table S1 Primer sequences**

| <u>underlined</u> = mutations      |           | <b>bold</b> = restriction sites                       |
|------------------------------------|-----------|-------------------------------------------------------|
| Primers for cloning                |           | Primer sequence ( 5' to 3' )                          |
| CD146 for pCR3.1-CD146-3'UTR       | Sense     | CCCAAGCTTATGGGGCTTCCCAGGCTG                           |
|                                    | Antisense | CCGGAATTCCCTACTTGTCTATCGTCATC                         |
| CD146 3'UTR for pCR3.1-CD146-3'UTR | Sense     | CCGGAATTCCCCCGAATCACCTTCAGC                           |
|                                    | Antisense | TGCTCTAGATATGATTTCTGGGACAATTAAG                       |
| CD146 3'UTR for Luc-3'UTR          | Sense     | CGGGGTACCCCCGAATCACCTTCAGCTCCCTT                      |
|                                    | Antisense | GAAGATCTTATGATTTCTGGGACAATTAAAGCTTTATTTTC             |
| CD146 3'UTR-Mut-N1                 | Sense     | CGGGCCTGGCTAGAGCTTCGCCACACAGTGTCTGTCTGTGTATGCATA      |
|                                    | Antisense | TATGCATACACACAGACAGACACTGTGTGGCGAAGCTCTAGCCAGGCCCG    |
| CD146 3'UTR-Mut-N2                 | Sense     | CGGGTGTGTGTGTCTGTCTCACACAATGCATACATATGTGTGTATAT       |
|                                    | Antisense | ATATACACACATATGTATGCATTGTGTGAGACAGACACACACACCCG       |
| CD146 3'UTR-Mut-N3                 | Sense     | GTGTGTATGCATACATATCACACAATATATGGTTTTGTCAGGTG          |
|                                    | Antisense | CACCTGACAAAACCATATATTGTGTGATATGTATGCATACACAC          |
| CD146 3'UTR-Mut-N4                 | Sense     | TGTGTGTATATATGGTTTTGTCTCCACACAAAATTTGCAAATTTTCCCTT    |
|                                    | Antisense | AAGGAAACAATTTGCAAAATTTGTGTGGACACAAAACCATATATACACACA   |
| CD146 3'UTR-Mut-P4                 | Sense     | TATGCATACATATGTGTGTAAAGAGGTTAACCAGGTGTGTAAATTTGCAAA   |
|                                    | Antisense | TTTGCAAAATTAACACACCTGGTTAACCTCTTTTACACACATATGTATGCATA |
| Primers for qRT-PCR                |           | Primer sequence ( 5' to 3' )                          |
| CD146                              | Sense     | TCAACGGCACGGCAAGTG                                    |
|                                    | Antisense | AGGCCGTGCATTCAACACC                                   |
| VEGF                               | Sense     | GAGGGCAGAATCATCACGAA                                  |
|                                    | Antisense | CATGGTGATGTTGGACTCCT                                  |
| ICAM-1                             | Sense     | CTGCAGACAGTGACCATC                                    |
|                                    | Antisense | GTCCAGTTTCCCGGACAA                                    |
| IL-8                               | Sense     | AAGAAACCACCGAAGGAACC                                  |
|                                    | Antisense | GTGTTGGCGCAGTGTGGTC                                   |
| MMP-2                              | Sense     | AGTCTGAAGAGCGTGAAG                                    |
|                                    | Antisense | CCAGGTAGGAGTGAGAATG                                   |
| MMP-9                              | Sense     | AACCAATCTCACCACAG                                     |
|                                    | Antisense | AAAGGCGTCGTCAATCAC                                    |
| GAPDH                              | Sense     | TGCACCACCAACTGCTTAGC                                  |
|                                    | Antisense | GGCATGGACTGTGGTCATGAG                                 |
| mCD146                             | Sense     | TCAATGGTTCGGCAACTGAATGGA                              |
|                                    | Antisense | GGGAGTTGGAGGCTGTACACTCTGCACC                          |
| mGAPDH                             | Sense     | CTCACTCAAGATTGTACAGCA                                 |
|                                    | Antisense | GTCTTCtgGGTGGCAGTGAT                                  |
| Primers for ChIP                   |           | Primer sequence ( 5' to 3' )                          |
| site 1                             | Sense     | AACTCTCAGTATCCAATCCATCCTC                             |
|                                    | Antisense | CAGAGAGTGCATTTAGTGCCCAGAA                             |
| site 2                             | Sense     | TCATGGTTGATGTCTGACTTGTGCA                             |
|                                    | Antisense | GGTAGCCCATCTCACACAAATCCCT                             |
| site 3                             | Sense     | AGGGATTTGTGTGAGATGGGCTACC                             |
|                                    | Antisense | AGAGGTGGACATTGGTATAAACAGA                             |
| site 4                             | Sense     | CATTGAAGAGTTGCTTTCCTGTGTTGA                           |
|                                    | Antisense | AGGAGTTGTTTTGGTCAACCACCTCCCTA                         |
| site 5                             | Sense     | GCTTTGTTTCATGAAGATGGCATGGTGGTTA                       |
|                                    | Antisense | CCCAGATCTTACCTATTAGTGAGCTC                            |
| site 6                             | Sense     | GGCACACAGCAGGCACCTTAATCAG                             |
|                                    | Antisense | CAGGAGTCTCGTCTTCATGGTCGG                              |
| site 7                             | Sense     | CCATGACACCCGAAGAGATGATTTT                             |
|                                    | Antisense | GCGTAGCGTAGTCAACCACGTCATT                             |
| site 8                             | Sense     | AAAAGGGTTTACGCCACACTGCATGTC                           |
|                                    | Antisense | TACCCCGAGGCAGTACTTGTACCAGAA                           |
| site 9                             | Sense     | GTTGCCATGCTTCATATGTTTTAC                              |
|                                    | Antisense | CAGCACAAAGGAGCCCTCAAGAAT                              |

19  
20

21 **Table S2** Screening for miRNAs regulating CD146.

|       |            | <b>Table S2</b>                              |             |                                                                 |                                                            |
|-------|------------|----------------------------------------------|-------------|-----------------------------------------------------------------|------------------------------------------------------------|
|       |            | <b>Screening for miRNAs regulating CD146</b> |             |                                                                 |                                                            |
| Color | Inhibition | No.                                          | miRNAs      | Regulation of CD146<br>in endothelium tested<br>by western blot | Regulation of<br>CD146 3'UTR tested<br>by luciferase assay |
|       | 0          |                                              |             |                                                                 |                                                            |
|       | 10%-30%    |                                              |             |                                                                 |                                                            |
|       | 30%-50%    |                                              |             |                                                                 |                                                            |
|       | 50%-80%    |                                              |             |                                                                 |                                                            |
|       |            | 1                                            | miR-17      |                                                                 |                                                            |
|       |            | 2                                            | miR-93      |                                                                 |                                                            |
|       |            | 3                                            | miR-106a    |                                                                 |                                                            |
|       |            | 4                                            | miR-106b    |                                                                 |                                                            |
|       |            | 5                                            | miR-20b     |                                                                 |                                                            |
|       |            | 6                                            | miR-20a     |                                                                 |                                                            |
|       |            | 7                                            | miR-92a     |                                                                 |                                                            |
|       |            | 8                                            | let-7a-2    |                                                                 |                                                            |
|       |            | 9                                            | let-7d      |                                                                 |                                                            |
|       |            | 10                                           | miR-221     |                                                                 |                                                            |
|       |            | 11                                           | miR-122a    |                                                                 |                                                            |
|       |            | 12                                           | miR-34a     |                                                                 |                                                            |
|       |            | 13                                           | miR-96      |                                                                 |                                                            |
|       |            | 14                                           | miR-200b    |                                                                 |                                                            |
|       |            | 15                                           | miR-9       |                                                                 |                                                            |
|       |            | 16                                           | miR-24      |                                                                 |                                                            |
|       |            | 17                                           | miR-34c     |                                                                 |                                                            |
|       |            | 18                                           | miR-199a-5p |                                                                 |                                                            |
|       |            | 19                                           | miR-107     |                                                                 |                                                            |
|       |            | 20                                           | miR-130a    |                                                                 |                                                            |
|       |            | 21                                           | miR-21      |                                                                 |                                                            |
|       |            | 22                                           | miR-31      |                                                                 |                                                            |
|       |            | 23                                           | miR-185     |                                                                 |                                                            |
|       |            | 24                                           | miR-25      |                                                                 |                                                            |
|       |            | 25                                           | miR-30c     |                                                                 |                                                            |
|       |            | 26                                           | miR-138-2   |                                                                 |                                                            |
|       |            | 27                                           | miR-143     |                                                                 |                                                            |
|       |            | 28                                           | miR-181a    |                                                                 |                                                            |
|       |            | 29                                           | miR-373     |                                                                 |                                                            |
|       |            | 30                                           | miR-342-5P  |                                                                 |                                                            |
|       |            | 31                                           | miR-527     |                                                                 |                                                            |
|       |            | 32                                           | miR-663     |                                                                 |                                                            |
|       |            | 33                                           | miR-632     |                                                                 |                                                            |
|       |            | 34                                           | miR-149     |                                                                 |                                                            |
|       |            | 35                                           | miR-329     |                                                                 |                                                            |

22

23

**Table S3** Algorithmic prediction of putative NF- $\kappa$ B binding sites within the miR-329 promoter.

**Table S3 Putative NF- $\kappa$ B binding sites within the miR-329 promoter**

| putative binding sites  | 1          | 2          | 3           | 4          | 5         | 6          | 7          | 8           | 9          |
|-------------------------|------------|------------|-------------|------------|-----------|------------|------------|-------------|------------|
| start position from TSS | -2879      | -2800      | -2619       | -2502      | -2354     | -2005      | -1527      | -468        | -308       |
| end position from TSS   | -2870      | -2791      | -2609       | -2493      | -2345     | -1996      | -1518      | -459        | -299       |
| sequence                | GGCAATTTCT | GGGAGTTTTC | GGGGGACCCAC | AGGGTTTTCC | GGAAATGCC | GGGACTTTCG | GGGAAATCGC | GGAAAGTCTCC | GGGGCTTTCT |

TSS, transcription start site

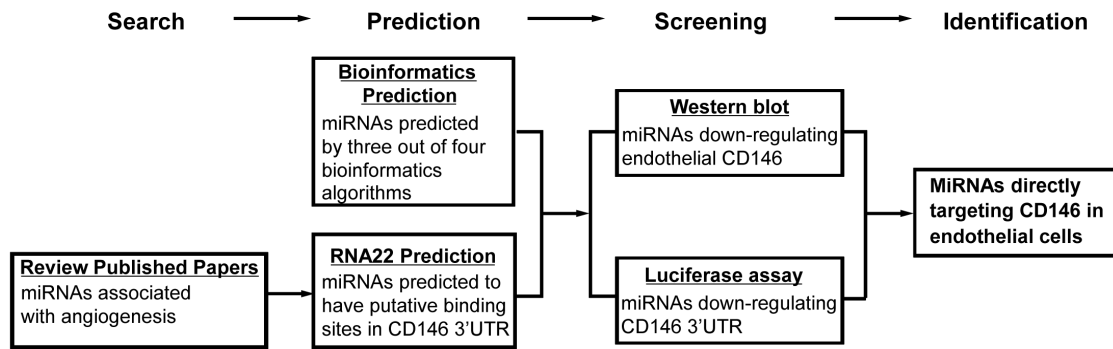

**FIG S1.** Two screening strategies for miRNAs targeting endothelial CD146.

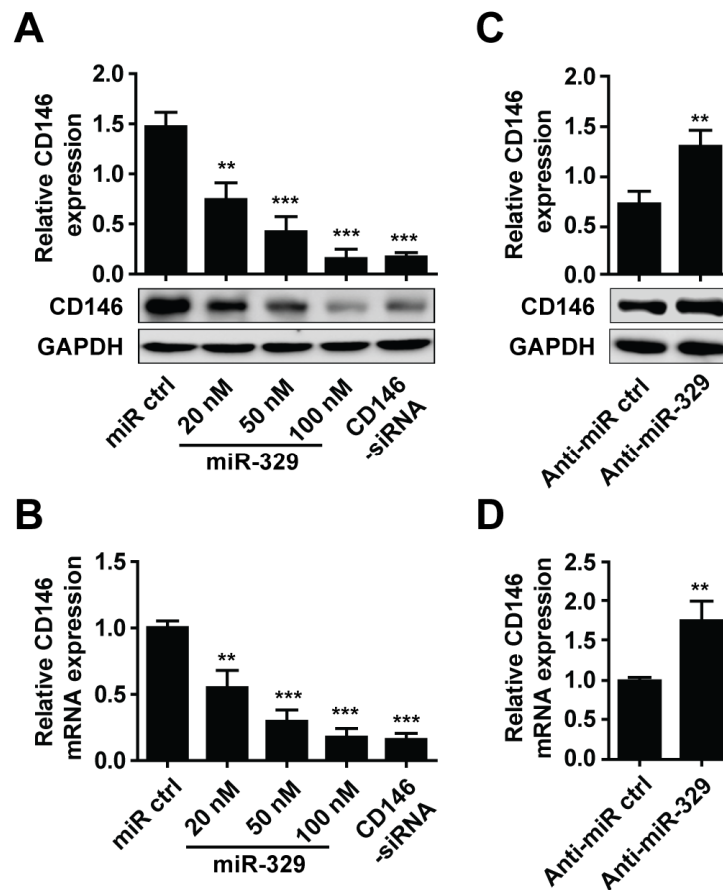

**FIG S2.** miR-329 down-regulates CD146 in HMECs. (A and B) Different doses of miR-329 mimics or control miRNA (miR ctrl) were transfected into HMECs. The protein and mRNA levels of CD146 were measured by western blot (A) or quantitative real-time PCR (B), respectively. GAPDH was used as an internal control. The mRNA expression was relative to that in HMECs transfected with control miRNA. (C and D) miR-329 inhibitor (anti-miR-329) or control anti-miRNA (anti-miR ctrl) (50 nM) was transfected into HMECs. The protein and mRNA expression of CD146 were analyzed by western blot (C) or quantitative real-time PCR (D), respectively. GAPDH was used as an internal control. The mRNA expression was relative to that in HMECs transfected with control anti-miRNA.  $**P<.01$ ,  $***P<.001$ . Error bars represent  $\pm$  s.d. Data are representative of three independent experiments.

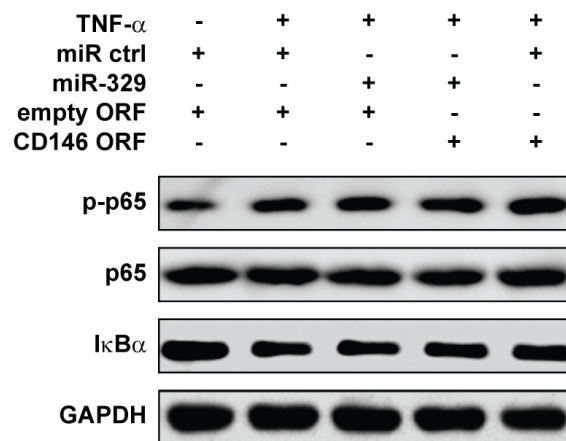

**FIG S3.** miR-329 does not impair TNF- $\alpha$ -induced NF- $\kappa$ B activation. NF- $\kappa$ B activation (NF- $\kappa$ B p65 phosphorylation and I $\kappa$ B $\alpha$  degradation) induced by TNF- $\alpha$  was determined by western blot after HUVECs were transfected with miR-329 or co-transfected with CD146 ORF (open reading frame without a 3'UTR). GAPDH was used as an internal control for I $\kappa$ B $\alpha$ . Total p65 served as an internal control for p-p65.

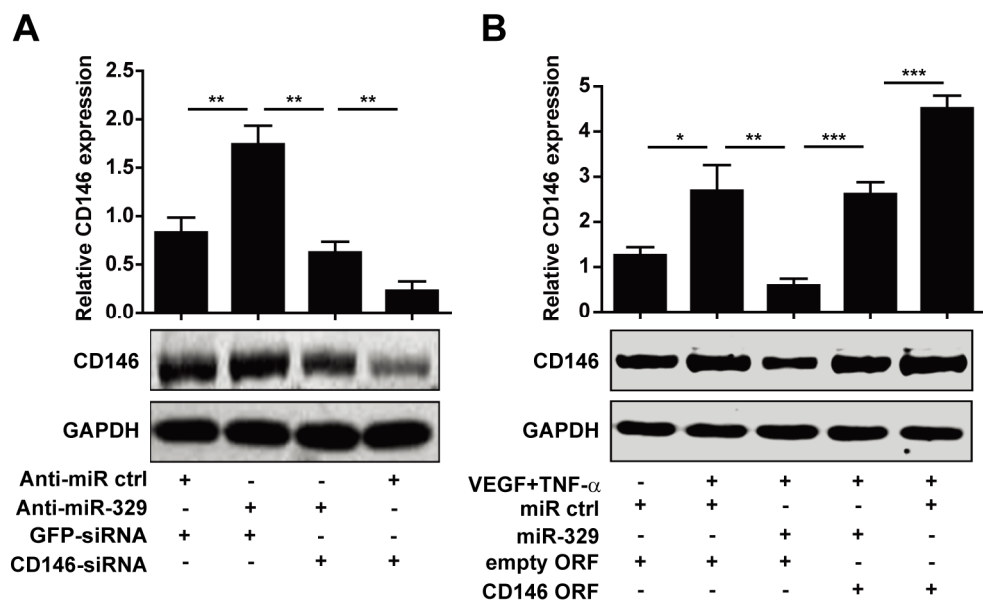

**FIG S4.** miR-329 regulates CD146 expression in HUVECs. (A) HUVECs were transfected with anti-miR-329 or co-transfected with CD146 siRNA as indicated. The expression of CD146 was measured by western blot. GAPDH served as an internal control. (B) HUVECs were transfected with miR-329 or co-transfected with CD146 ORF (open reading frame without 3'UTR) as indicated. Protein levels of CD146 were determined by western blot. GAPDH was used as an internal control. \* $P < .05$ , \*\* $P < .01$ , \*\*\* $P < .001$ . Results are presented as the mean  $\pm$  s.d. of three independent assays.

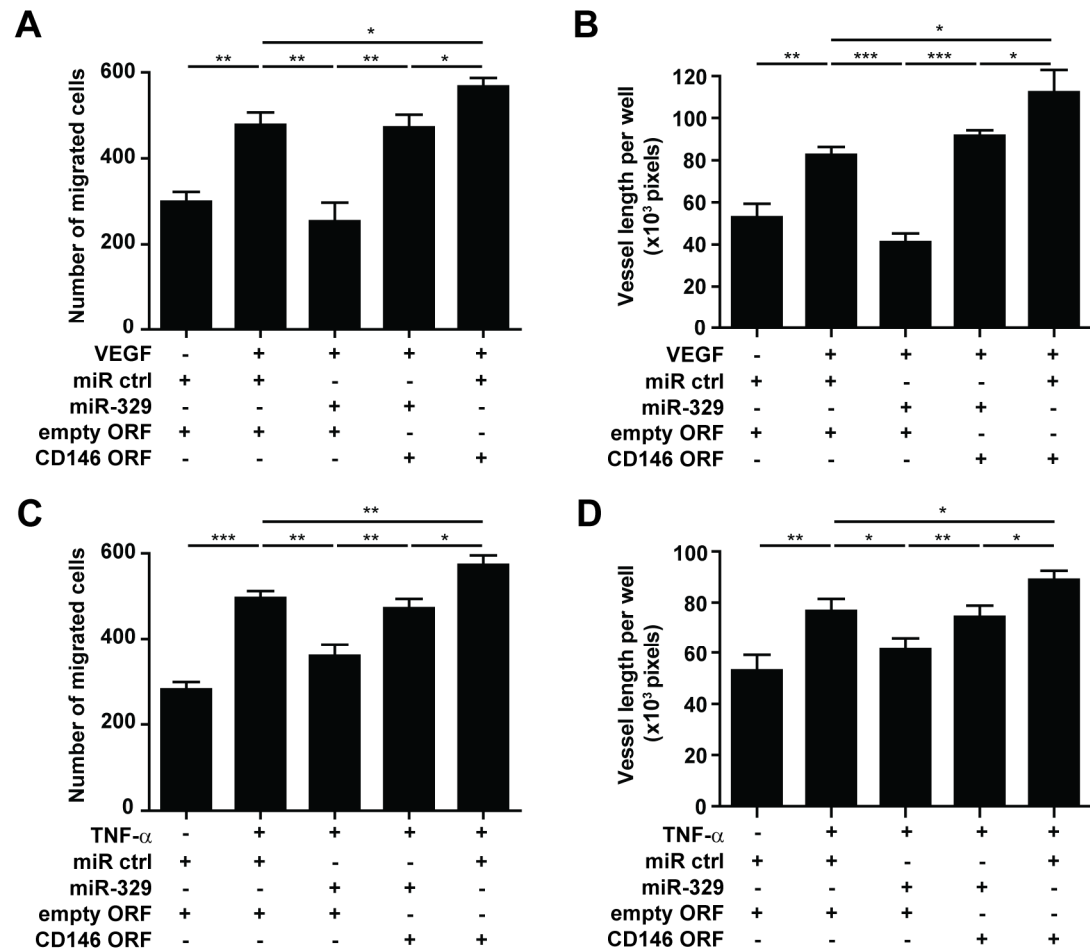

**FIG S5.** miR-329 inhibits VEGF- and TNF- $\alpha$ -induced endothelial cell tube formation and migration. VEGF-induced cell migration (A) or tube formation (B) was measured after HUVECs were transfected with miR-329 or co-transfected with CD146 ORF. The number of migrated cells or the length of the vessels was measured from 3 independent assays. TNF- $\alpha$ -induced cell migration (C) or tube formation (D) was determined in HUVECs with transfections as indicated. The number of migrated cells or the length of the vessels was quantified and presented in the histogram. \* $P < .05$ , \*\* $P < .01$ , \*\*\* $P < .001$ . Results are presented as the mean  $\pm$  s.d. of three independent assays.
